# Supplementary material for: Critical amino acid residues and potential N-linked glycosylation sites contribute to circulating recombinant form 01_AE pathogenesis in Northeast China
Source: PubMed Central journal article supplement — AIDS. 2019 Mar 13;33(9):1431–9. doi: 10.1097/QAD.0000000000002197 (PMC6635051; doi:10.1097/qad.0000000000002197), 2019-03-13
Supplement: aids-33-1431-s001.pdf [file aids-33-1431-s001.pdf]

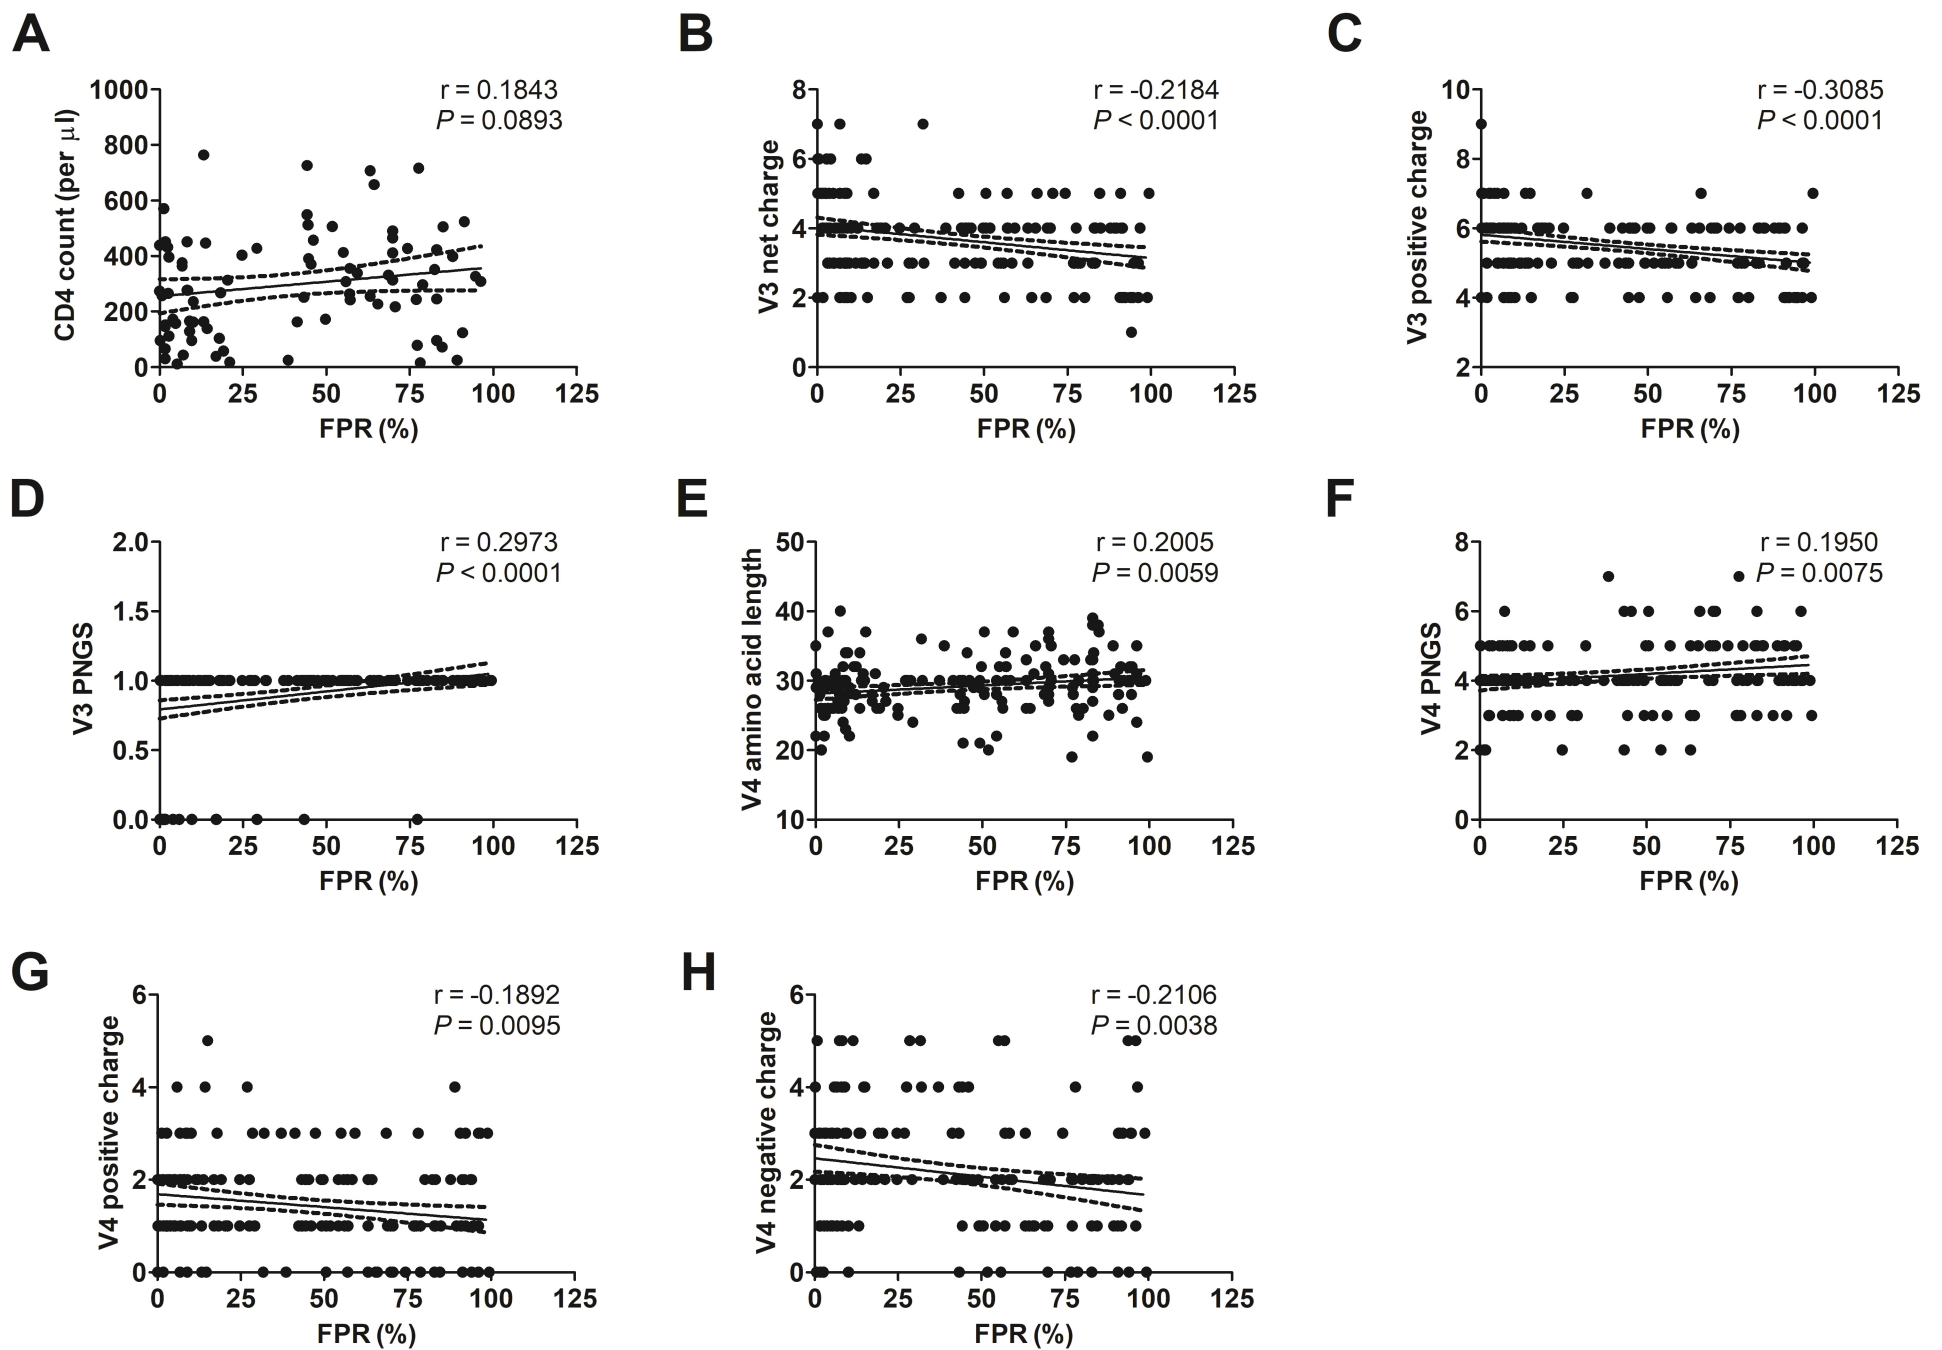

**Figure S2. Factors associated with the coreceptor usage of HIV-1 isolates in Northeast China.** Correlation analyses between FPR value and CD4 cell count (A), the numbers of net charges (B), positive charges (C) and PNGSs (D) in V3 region and the amino acid length (E), the numbers of PNGSs (F), positive (G) and negative (H) charges in V4 region were done.  $r$ , correlation coefficient.

**Table S1 Genotype and risk group distribution of Jilin viruses**

|                       | Sampling year [case (%)]        |                         |                                |                                            | Total<br>( <i>n</i> = 310) |
|-----------------------|---------------------------------|-------------------------|--------------------------------|--------------------------------------------|----------------------------|
|                       | Before 2007<br>( <i>n</i> = 39) | 2007<br>( <i>n</i> = 3) | 2010-2012<br>( <i>n</i> = 172) | 2015-2016<br>( <i>n</i> = 96) <sup>a</sup> |                            |
| <b>Genotype</b>       |                                 |                         |                                |                                            |                            |
| CRF01_AE <sup>b</sup> | 0 (0.0)                         | 0 (0.0)                 | 92 (53.5)                      | 64 (66.7)                                  | 156 (50.3)                 |
| Subtype B             | 39 (100)                        | 1 (33.3)                | 35 (20.4)                      | 5 (5.2)                                    | 80 (25.8)                  |
| CRF07_BC/CRF08_BC/ C  | 0 (0.0)                         | 0 (0.0)                 | 26 (15.1)                      | 18 (18.7)                                  | 44 (14.2)                  |
| CRF02_AG              | 0 (0.0)                         | 0 (0.0)                 | 5 (2.9)                        | 0 (0.0)                                    | 5 (1.6)                    |
| URF <sup>c</sup>      | 0 (0.0)                         | 2 (66.7)                | 14 (8.1)                       | 9 (9.4)                                    | 25 (8.1)                   |
| <b>Risk group</b>     |                                 |                         |                                |                                            |                            |
| MSM <sup>d</sup>      | 0 (0.0)                         | 1 (33.3)                | 96 (55.8)                      | 70 (72.9)                                  | 167 (53.9)                 |
| Heterosexual          | 0 (0.0)                         | 1 (33.3)                | 60 (34.9)                      | 11 (11.5)                                  | 72 (23.3)                  |
| Bisexual              | 0 (0.0)                         | 0 (0.0)                 | 0 (0.0)                        | 2 (2.1)                                    | 2 (0.6)                    |
| Nosocomial            | 0 (0.0)                         | 0 (0.0)                 | 10 (5.8)                       | 0 (0.0)                                    | 10 (3.2)                   |
| IDU <sup>e</sup>      | 0 (0.0)                         | 0 (0.0)                 | 4 (2.3)                        | 0 (0.0)                                    | 4 (1.3)                    |
| Mother-to-child       | 0 (0.0)                         | 0 (0.0)                 | 1 (0.6)                        | 0 (0.0)                                    | 1 (0.3)                    |
| Unknown               | 39 (100)                        | 1 (33.4)                | 1 (0.6)                        | 13 (13.5)                                  | 54 (17.4)                  |

<sup>a</sup>, viruses identified in this study; <sup>b</sup> CRF, circulating recombinant form; <sup>c</sup> URF, unique recombinant form; <sup>d</sup> MSM, men who have sex with men; <sup>e</sup>

IDU, intravenous drug user.

**Table S2 Clinical and phylogenetic data of 96 newly identified Jilin samples in this study**

| Sequence name | Sampling year | Gender | Age | Risk Factor | CD4 count (per µL) | Viral load (per mL) | Co-infection | Fiebig stage | HIV infection status * | Genbank number of gag gene | Genbank number of env gene | genotype (gag : HXB2 nt836-1507) | genotype (env : HXB2 nt7002-7541) | Subtype** | Env V3 sequence                       | FPR*** | Env V4 sequence                        |
|---------------|---------------|--------|-----|-------------|--------------------|---------------------|--------------|--------------|------------------------|----------------------------|----------------------------|----------------------------------|-----------------------------------|-----------|---------------------------------------|--------|----------------------------------------|
| JL15001       | 2015          | Male   | 27  | Hetero      | 403                | 1370000             | NR           | II           | Recent infection       | MH119979                   | MH120075                   | CRF01_AE                         | CRF01_AE                          | CRF01_AE  | CTRPSNNTRTSIRIGPGQMFRYRTGDIVDIRKAYC   | 24.7   | CDTTKLFNSTENGLTSLKSDTILPC              |
| JL15002       | 2015          | Male   | 40  | MSM         | 439                | 48200               | NR           | I            | Recent infection       | MH119980                   | MH120076                   | CRF07_BC                         | B                                 | URF BC    | CTRPNKKTRKRITTPGGRVYYTTGVEIGDIRQAHC   | 0      | CKSTQLFNSTWAGNNTWNSSAERSDDTGGNTILPC    |
| JL15003       | 2015          | Male   | 29  | MSM         | 16                 | 20800               | NR           | III          | Long-term infection    | MH119981                   | MH120077                   | CRF01_AE                         | CRF01_AE                          | CRF01_AE  | CTRPSNNTRQSIRIGPGQMFRRTGDIIDPRQAYC    | 78.1   | CNTTKLFNSTEDGTRERFNETILPC              |
| JL15004       | 2015          | Female | 47  | Hetero      | 244                | 87600               | NR           | I            | Recent infection       | MH119982                   | MH120078                   | CRF01_AE                         | CRF01_AE                          | CRF01_AE  | CTRPSNNTRTSVSIIGPGQAFYRTGDIIDIRQAYC   | 76.9   | CNTTKLFNSTWEGNETMGSSNNNGTILPC          |
| JL15005       | 2015          | Male   | 56  | MSM         | 158                | 72400               | NR           | I            | Recent infection       | MH119983                   | MH120079                   | CRF01_AE                         | CRF01_AE                          | CRF01_AE  | CTRPSNNTRTSIGIGPGRIFYRTGDIIDIRQAFC    | 4.8    | CNTSRLFNSTWIGNETREEGNNNATILPC          |
| JL15006       | 2015          | Male   | 19  | MSM         | 396                | 1080000             | NR           | I            | Recent infection       | MH119984                   | MH120080                   | CRF01_AE                         | CRF01_AE                          | CRF01_AE  | CTRPSNNTRTSIRIGPGQVFYRTGDIIDIRKAYC    | 2.8    | CNTTKLFNSTENGLTEGNSNTILPC              |
| JL15007       | 2015          | NR     | 21  | Hetero      | 104                | 82000               | NR           | III          | Long-term infection    | MH119985                   | MH120081                   | B                                | B                                 | B         | CTRPNNNTRKSIQLVGGRSYATGDIIDIRQAHC     | 17.9   | CNTTKLFNYTLQDNETWQGSNNKSVITLPC         |
| JL15008       | 2015          | Male   | 20  | NR          | 173                | 125000              | NR           | III          | Recent infection       | MH119986                   | MH120082                   | CRF01_AE                         | CRF01_AE                          | CRF01_AE  | CTRPSNNTRKSITIGPGQMFRYRTGDIIDIRQAFC   | 49.7   | CNTSKLFNSTWYKNGTMEGLNGTINGTILPC        |
| JL15009       | 2015          | Male   | 40  | MSM         | 30                 | 829500              | NR           | I            | Long-term infection    | MH119987                   | MH120083                   | CRF01_AE                         | CRF01_AE                          | CRF01_AE  | CTRPNNNTRIGISTGPRVYYRTGDIIDIRKAYC     | 1.7    | CNTSKLFNSTWTGNETKQNGTDPILPC            |
| JL15010       | 2015          | Male   | 23  | MSM         | 313                | 96400               | NR           | I            | Recent infection       | MH119988                   | MH120084                   | CRF07_BC                         | CRF07_BC                          | CRF07_BC  | CTRPGNNTRKSIRIGPGQTFYATGDIIDIRQAHC    | 69.8   | CNTSSLFNGTYNATD-NDTASNATTIQC           |
| JL15011       | 2015          | Male   | 27  | MSM         | 217                | 78700               | NR           | I            | Recent infection       | MH119989                   | MH120085                   | CRF01_AE                         | CRF07_BC                          | URF 0107  | CTRPNNNTRKSIRIGPGQTFYATGAIIDIRQAHC    | 70.6   | CNTSGLFNSTYMPNGTFNDTGDNSTITIQC         |
| JL15012       | 2015          | Male   | 21  | MSM         | 355                | 59700               | NR           | I            | Recent infection       | MH119990                   | MH120086                   | CRF07_BC                         | CRF07_BC                          | CRF07_BC  | CTRPGNNTRKSIRIGPGQTFYATGEIIGDIRQAHC   | 57     | CNTSGLFNSTYMTNGTFNFSGTGNDSTITIPC       |
| JL15013       | 2015          | Male   | 45  | MSM         | 351                | 31300               | NR           | I            | Recent infection       | MH119991                   | MH120087                   | CRF01_AE                         | CRF01_AE                          | CRF01_AE  | CTRPSNNTRKSINIGPGQAFYRTGDIIDIRQAFC    | 82.4   | CNTTKLFSGNVTEGNTLHNSGTINGTILPC         |
| JL15014       | 2015          | Male   | 29  | MSM         | 364                | 526000              | NR           | I            | Long-term infection    | MH119992                   | MH120088                   | CRF01_AE                         | CRF01_AE                          | CRF01_AE  | CTRPSNNTRTSIRIGPGQVFYRTGDIIDIRKAYC    | 6.8    | CNTTKLFSSTENGLTEGNSNTILPC              |
| JL15015       | 2015          | Male   | 52  | MSM         | 95                 | 116200              | NR           | I            | Long-term infection    | MH119993                   | MH120089                   | CRF01_AE                         | CRF07_BC                          | URF 0107  | CTRPNNNTRKSIRIGPGQTFYATGDIIDIRQAHC    | 83     | CNTSGLFNSTYNSDNGKNDSSISIPC             |
| JL15016       | 2015          | Male   | 19  | MSM         | 308                | 416000              | NR           | I            | Recent infection       | MH119994                   | MH120090                   | CRF01_AE                         | CRF01_AE                          | CRF01_AE  | CTRPSNNTRTSITIGPGTFYRTGEIIGNIRQAYC    | 55.8   | CNTTKLFNSTGGNTRGNNGTILPC               |
| JL15017       | 2015          | Male   | 26  | MSM         | 173                | 1011000             | NR           | III          | Recent infection       | MH119995                   | MH120091                   | CRF01_AE                         | CRF01_AE                          | CRF01_AE  | CTRPSNNTRTSIKFPGRMFRYRTGAIIDIRKAYC    | 4      | CNTTKLFNSTENGLTEGNTILPC                |
| JL15018       | 2015          | Male   | 40  | MSM         | 79                 | 1139800             | NR           | I            | Long-term infection    | MH119996                   | MH120092                   | CRF01_AE                         | CRF01_AE                          | CRF01_AE  | STRPSTNTRTSITIGPGQVLFRTGAVVGDVVMAYC   | 77.2   | FNTTKNSCTNSGTIEGTGTNGTILPC             |
| JL15019       | 2015          | Male   | 25  | MSM         | 490                | 403000              | NR           | I            | Recent infection       | MH119997                   | MH120093                   | CRF07_BC                         | CRF07_BC                          | CRF07_BC  | CTRPGNNTRKSIRIGPGQTFYATGDIIDIRQAHC    | 69.8   | CNTSGLFNSTFNSTYTHNETDNGTITIPC          |
| JL15020       | 2015          | Male   | 48  | Hetero      | 25                 | 229000              | NR           | III          | Long-term infection    | MH119998                   | MH120094                   | CRF01_AE                         | CRF01_AE                          | CRF01_AE  | CTRPSNNTRTSIHMGPQTFYRTGDIIDIRKAYC     | 89.1   | CNTTKLFNSTWKGTETRNETIGNTTIQGNTIIPC     |
| JL15021       | 2015          | Male   | 32  | MSM         | 255                | 8100                | NR           | I            | Recent infection       | MH119999                   | MH120095                   | B                                | B                                 | B         | CTRPNNNTRRSINIGPGAFYATGDIIDIRQAHC     | 63.1   | CNTSKLFNSTWNSQLNSNGTEGNDTTPISLPC       |
| JL15022       | 2015          | Male   | NR  | MSM         | NR                 | NR                  | NR           | NR           | Recent infection       | MH120000                   | MH120096                   | CRF01_AE                         | CRF07_BC                          | URF 0107  | CTRPGNNTRKSIRIGPGQTFYATGEIIGDIRQAHC   | 57     | CDTSGLFNSTRHPNGTFNGTEDNSTITIQC         |
| JL15023       | 2015          | Male   | 29  | MSM         | 339                | 89500               | NR           | I            | Recent infection       | MH120001                   | MH120097                   | CRF07_BC                         | CRF07_BC                          | CRF07_BC  | CTRPNNNTRKSIRIGPGQTFYATGGIIGDIRQAYC   | 59.2   | CNTSGLFNSTYMHNGTFKIEWSVI-INTEGNSTIKLPC |
| JL15024       | 2015          | NR     | NR  | NR          | NR                 | NR                  | NR           | NR           | Long-term infection    | MH120002                   | MH120098                   | CRF07_BC                         | CRF07_BC                          | CRF07_BC  | CTRPGNNTRKSIRIGPGQTFYATGDIIDIRQAHC    | 69.8   | CNTSGLFNSTYNTSTFN-Q92TGSNSTIIPC        |
| JL15025       | 2015          | NR     | 38  | NR          | 716                | 7500                | NR           | I            | Recent infection       | MH120003                   | MH120099                   | B                                | B                                 | B         | CIRPNNNTRKSIQLAGGRALYATGDIIDIRQAHC    | 77.6   | CNTTKLFNYTFNDNISENTLNTSANITLPC         |
| JL15026       | 2015          | Male   | 34  | MSM         | 428                | 188000              | NR           | I            | Recent infection       | MH120004                   | MH120100                   | CRF01_AE                         | CRF01_AE                          | CRF01_AE  | CTRPSNNVTRTSIHIGPGRIFYRTGDIIGNIRQAYC  | 29.1   | CNTTKLFNSNTGGDNDTILPC                  |
| JL15027       | 2015          | NR     | 20  | NR          | 411                | 208000              | NR           | II           | Recent infection       | MH120005                   | MH120101                   | CRF07_BC                         | CRF07_BC                          | CRF07_BC  | CTRPGNNTRKSIRIGPGQTFYATGDIIDIRQAHC    | 69.8   | CNTSSLFNSTYMTNGTFKFNNDTFNGTESNSTIIPC   |
| JL15028       | 2015          | NR     | 46  | NR          | 95                 | 59600               | NR           | III          | Long-term infection    | MH120006                   | MH120102                   | CRF01_AE                         | CRF01_AE                          | CRF01_AE  | CTRPSNNTRTSVPMGPGRAFYRTGDIIDIRQAYC    | 9.6    | CNTTKLFNSTWENDTMEVGNNGTNNNGTILPC       |
| JL15029       | 2015          | Male   | 21  | Sexual      | 764                | 87100               | NR           | I            | Recent infection       | MH120007                   | MH120103                   | CRF07_BC                         | CRF07_BC                          | CRF07_BC  | CTRPGNNTRKSIRIGPGQTFYATGAIIDIRRAHC    | 13.2   | CNTSGLFNSTYMPNGTFNAPNGTNDSTIIPC        |
| JL15030       | 2015          | Male   | 28  | MSM         | 707                | <1000               | NR           | I            | Recent infection       | MH120008                   | MH120104                   | CRF01_AE/B                       | CRF07_BC                          | URF 01BC  | CTRPNNNTRKSIRIGPGQTFYATGEVIGDIRQAHC   | 63.1   | CNTTGLFNSTYMTSGLSNDTNSSTIIPC           |
| JL15031       | 2015          | NR     | 55  | Sexual      | 95                 | 456100              | NR           | III          | Long-term infection    | MH120009                   | MH120105                   | CRF01_AE                         | CRF01_AE                          | CRF01_AE  | CIRPFSTIRTSIRIGPVQVFRHTGGTGVIGKAHC    | 0.2    | CNTTKLFNTEITFEFNSTDNGTMEGNITLPC        |
| JL15032       | 2015          | Male   | 34  | MSM         | 129                | 82200               | NR           | I            | Recent infection       | MH120010                   | MH120106                   | CRF01_AE                         | CRF01_AE                          | CRF01_AE  | CTRPSNNTRTSIRIGPGQTFYRTGDIIDIRKAYC    | 9      | CNTTKLFNGTTEESNDTILPC                  |
| JL15033       | 2015          | Male   | 56  | MSM         | 399                | 185000              | NR           | I            | Long-term infection    | MH120011                   | MH120107                   | CRF01_AE                         | CRF01_AE                          | CRF01_AE  | CIRPSNNTRRESIRIGPGQMFRYRTGAIIGNIREAHC | 87.8   | CNTTQLFNRTKTEGLENTTILPC                |
| JL15034       | 2015          | Male   | 30  | NR          | 162                | 67100               | NR           | III          | Long-term infection    | MH120012                   | MH120108                   | CRF01_AE                         | CRF01_AE                          | CRF01_AE  | CTRPSNNTRTSISLGPQVFYRTGDIIDIRLAYC     | 10.1   | CNTTKLFNSTWPRNHTNGGNGNTILPC            |

|         |      |      |    |          |     |         |     |     |                     |          |               |            |              |          |                                       |               |                                   |
|---------|------|------|----|----------|-----|---------|-----|-----|---------------------|----------|---------------|------------|--------------|----------|---------------------------------------|---------------|-----------------------------------|
| JL15035 | 2015 | Male | 33 | MSM      | 112 | 178900  | NR  | III | Long-term infection | MH120013 | MH120109      | CRF01_AE   | CRF01_AE     | CRF01_AE | CTRPYNNTRTSVHIGPGRAFXYKTGDIIGDIRQAYC  | 2.8           | CNTTKLFNSNRKNGTVEGDINGTTILPC      |
| JL15036 | 2015 | Male | 27 | MSM      | 58  | 69600   | NR  | III | Long-term infection | MH120014 | MH120110      | CRF01_AE   | CRF01_AE     | CRF01_AE | CIRPSNNTRTSIRIGPGQMFYRTGEITGDIRKAYC   | 19.1          | CNTTKLFNSTENGTFRENTTILPC          |
| JL15037 | 2015 | Male | 24 | MSM      | 152 | 54500   | NR  | I   | Recent infecion     | MH120015 | MH120111      | CRF01_AE   | CRF01_AE     | CRF01_AE | CARPYNNTRTSTRIGPGQMFYRTGEIIGNIRQAYC   | 1.7           | CNTTKLFNTTKNGTMEGLNGTILPC         |
| JL15038 | 2015 | Male | 23 | MSM      | 264 | 86900   | NR  | I   | Recent infecion     | MH120016 | MH120112      | CRF01_AE   | CRF01_AE     | CRF01_AE | CTRPSNNTRSSIPMGPRGVFYRTGDIIGNIRQAHC   | 56.9          | CNTTKLFNSTWNETMEGGNNNDTGKDDTILPC  |
| JL15039 | 2015 | Male | NR | NR       | NR  | NR      | NR  | NR  | Recent infecion     | MH120017 | MH120113      | CRF01_AE   | CRF01_AE     | CRF01_AE | CTRPNNNTRTSTPIGPGGAFFKTGDIIGDIRQAYC   | 8.2           | CNTSKLFNSTWNGTQEIGKGDNDTIVLPC     |
| JL15040 | 2015 | NR   | NR | NR       | NR  | NR      | NR  | NR  | Recent infecion     | MH120018 | MH120114      | CRF01_AE   | CRF01_AE     | CRF01_AE | CTRPSNNTRTSTRIGPGQVFYRTGSIIGDIRKAHC   | 2.9           | CNTTKLFKGTENGTEESNATILPC          |
| JL15041 | 2015 | NR   | NR | NR       | NR  | NR      | NR  | NR  | Long-term infection | MH120019 | MH120115      | CRF01_AE   | CRF01_AE     | CRF01_AE | CTRPSNNTRTSTRFPGQMFYRTGDIIGDIRKAYC    | 5.4           | CNTTKLFNTINETLVGNNTSNTTILPC       |
| JL15042 | 2015 | Male | 27 | NR       | 11  | 498000  | NR  | III | Long-term infection | MH120020 | MH120116      | CRF01_AE   | CRF01_AE     | CRF01_AE | CTRPSNNTRKSTSIGPGQVFYRTGDIIGDIRKAYC   | 5.3           | CNTTKLFNTTENGTTTEGLNGTILPC        |
| JL15043 | 2015 | NR   | NR | NR       | NR  | NR      | NR  | NR  | Recent infecion     | MH120021 | Not available | CRF07_BC   | Not obtained | CRF07_BC | Not available                         | Not available | Not available                     |
| JL16001 | 2016 | NR   | 35 | Sexual   | 139 | 58900   | NR  | I   | Recent infecion     | MH120022 | MH120117      | CRF01_AE   | CRF01_AE     | CRF01_AE | CTRPSNNTRTSSISIGPGAFYRTGDIIGDIRQAF    | 14.3          | CNTTKLFNSTWNRKWNHNTDSGNKSDTITLPC  |
| JL16002 | 2016 | Male | 25 | MSM      | 441 | 31300   | NR  | I   | Long-term infection | MH120023 | MH120118      | CRF01_AE   | CRF01_AE     | CRF01_AE | CTRPYNNTRTSSISIGPGSFLSRTGDIIGDLRQAYC  | 1.7           | CNTTKMFNNAGSNGTILPC               |
| JL16003 | 2016 | Male | 35 | MSM      | 386 | 157000  | NR  | I   | Recent infecion     | MH120024 | Not available | CRF01_AE   | Not obtained | CRF01_AE | Not available                         | Not available | Not available                     |
| JL16004 | 2016 | Male | 39 | MSM      | 25  | 121000  | HBV | IV  | Long-term infection | MH120025 | MH120119      | B          | B            | B        | CTRPNNNTRKSIHLGGQAWYATGDIIGDIRQAHC    | 38.5          | CNTSQLFNSTWDNNTWNTNDTWNNTSNTATLPC |
| JL16005 | 2016 | Male | 21 | MSM      | 413 | 243000  | NR  | I   | Long-term infection | MH120026 | MH120120      | CRF01_AE   | CRF01_AE     | CRF01_AE | CTRPSNNTRTSINIGPGAFYRIGDITGDIRQAYC    | 55            | CNTTKLFNSTWKGNETREEGNSDTILPC      |
| JL16006 | 2016 | Male | 52 | MSM      | 327 | 37200   | NR  | I   | Long-term infection | MH120027 | MH120121      | CRF01_AE   | CRF01_AE     | CRF01_AE | CTRPSNNTRTSIQIGPGQAFKDTGDIIGDKQAYC    | 94.6          | CNTTKLFNSTWTGNETINGDNDTILPC       |
| JL16007 | 2016 | Male | 25 | MSM      | 245 | 11200   | NR  | I   | Recent infecion     | MH120028 | MH120122      | CRF07_BC   | CRF07_BC     | CRF07_BC | CTRPNNNTRKSIRIGPGQTFYATGDIIGDIRQAHC   | 83            | CNTSGLFNFTFMSNSTFNGTESNSTITPC     |
| JL16008 | 2016 | Male | 20 | MSM      | 277 | 297000  | NR  | I   | Recent infecion     | MH120029 | MH120123      | CRF01_AE   | CRF01_AE     | CRF01_AE | CTRPYNNTRTSIRIGPGQVYRTGEITGDIRSAYC    | 8.2           | CNTTKLFNGTENGTRIANHTIPC           |
| JL16009 | 2016 | Male | 39 | MSM      | 657 | 18400   | NR  | I   | Long-term infection | MH120030 | MH120124      | CRF01_AE   | CRF01_AE     | CRF01_AE | CTRPSNNTRTSSVIGPGAAFIYRTGDIIGDIRQAYC  | 64.3          | CNTTKLFNTTMTFNTRNTKITILPC         |
| JL16010 | 2016 | Male | 56 | MSM      | 452 | 30600   | NR  | III | Long-term infection | MH120031 | MH120125      | CRF01_AE   | CRF01_AE     | CRF01_AE | CTRPNNNTRTSTRIGPGQVFYRTGEIIGDIRKASC   | 1.8           | CNTTQLFNSTQNETLGEYNDTITLPC        |
| JL16011 | 2016 | Male | 24 | MSM      | 432 | 145000  | NR  | I   | Recent infecion     | MH120032 | MH120126      | CRF01_AE   | CRF01_AE     | CRF01_AE | CTRPNNNTRKSTRIGPGQMFYRTGEIIGDIRKAYC   | 2.4           | CNTTQLFNSTELFNGTREGNITLPC         |
| JL16012 | 2016 | Male | 19 | MSM      | 465 | 196000  | NR  | I   | Recent infecion     | MH120033 | MH120127      | CRF01_AE   | CRF07_BC     | URF 0107 | CTRPNNNTRKSIRIGPGQTFYATGDIIGDIRQAHC   | 69.8          | CNTSGLFNSTYMSNGTLNGTENNLTITPC     |
| JL16013 | 2016 | Male | 35 | MSM      | 313 | 30200   | NR  | I   | Recent infecion     | MH120034 | MH120128      | CRF01_AE/B | CRF01_AE     | URF 01B  | CTRPSNNTRTSSVIRIGPGQMFYRTGEIIGDIRKAYC | 20.4          | CNTTKLFNGTENGTEEFNGTNGTILPC       |
| JL16014 | 2016 | Male | 59 | MSM      | 66  | 1340000 | NR  | I   | Long-term infection | MH120035 | MH120129      | CRF01_AE   | CRF01_AE     | CRF01_AE | CTRPSNNIRISTRIGPGQVFYRTGDIIGDIRKAYC   | 1.7           | CNTSKLFNTTNGTLDGSVNATILPC         |
| JL16015 | 2016 | Male | 36 | MSM      | 331 | 211000  | NR  | I   | Recent infecion     | MH120036 | MH120130      | CRF01_AE   | CRF01_AE     | CRF01_AE | CSRPSNNTRTSISFAPGQSFYKTGEIIGDIRQAYC   | 68.6          | CNTSKLFNSTWRGNETKKNNDTGTHILPC     |
| JL16016 | 2016 | Male | 74 | Bisexual | 265 | 216000  | NR  | I   | Long-term infection | MH120037 | MH120131      | CRF01_AE   | CRF01_AE     | CRF01_AE | CTRPSNNTRTSTRIGPGQVFYRTGEIIGNIRKAYC   | 2.6           | CNTTKLFNGTGNNGINGTILPC            |
| JL16017 | 2016 | Male | 56 | Bisexual | 18  | 117000  | NR  | III | Long-term infection | MH120038 | MH120132      | CRF01_AE   | CRF01_AE     | CRF01_AE | CTRPSNNTRTSSISMGPGRFYRTGDIIGDIRQAYC   | 21            | CNTSGLFNSTWRNGTEGNSTDPILPC        |
| JL16018 | 2016 | Male | 31 | MSM      | 451 | 90100   | NR  | I   | Recent infecion     | MH120039 | MH120133      | CRF07_BC   | CRF07_BC     | CRF07_BC | CMRPNNNTRKSIRIGPGQTFYATGEIIGNIRQAHC   | 8.2           | CNTSGLFNKTYMSNSTFVNKENTSITVPC     |
| JL16019 | 2016 | Male | 29 | MSM      | 423 | 71200   | NR  | I   | Recent infecion     | MH120040 | MH120134      | CRF01_AE   | CRF07_BC     | URF 0107 | CTRPNNNTRKSIRIGPGQTFYATGDIIGDIRQAHC   | 83            | CNTSGLFNNSLNNSTSNSTESNTITIQ       |
| JL16020 | 2016 | Male | 23 | MSM      | 276 | 134200  | NR  | I   | Recent infecion     | MH120041 | MH120135      | CRF01_AE   | CRF01_AE     | CRF01_AE | CTRPSNNTRTSSVIGLGRAWYRTGDIIGDIRQAYC   | 8.5           | CNTTKLFNSSNNRNTGGNDTHILPC         |
| JL16021 | 2016 | Male | 39 | MSM      | 257 | 57500   | NR  | I   | Recent infecion     | MH120042 | MH120136      | CRF01_AE   | CRF01_AE     | CRF01_AE | CTRPSNNIRISRIHIGPGAFRTGDIIGDIRQAYC    | 0.7           | CNTTKLFNSTWTGNETETMEEGNDTILPC     |
| JL16022 | 2016 | Male | 28 | MSM      | 163 | 1170000 | NR  | I   | Recent infecion     | MH120043 | MH120137      | CRF01_AE   | CRF01_AE     | CRF01_AE | CTRPSNNTRTSSISLPGRTFYRTGDIIGDIRQAYC   | 41.2          | CNTTKLFNSTWKGNETKGNNDTILPC        |
| JL16023 | 2016 | Male | 51 | MSM      | 44  | 78300   | NR  | III | Long-term infection | MH120044 | MH120138      | CRF01_AE   | CRF01_AE     | CRF01_AE | CTRPNNNTRTSLNIGPGQAFYRTGDIIGDIRQAF    | 7.1           | CNTTKLFNSTWINETSGYNDTGPIILPC      |
| JL16024 | 2016 | Male | 22 | MSM      | 447 | 18100   | NR  | II  | Recent infecion     | MH120045 | MH120139      | CRF01_AE   | CRF01_AE     | CRF01_AE | CTRPSNNTRKSTSIGPGQVFYRTGDIIGDIRQAYC   | 13.8          | CNTTKLFNSTWTGNSTIKGNNDTILPC       |
| JL16025 | 2016 | Male | 29 | MSM      | 416 | 235000  | NR  | I   | Recent infecion     | MH120046 | Not available | CRF01_AE   | Not obtained | CRF01_AE | Not available                         | Not available | Not available                     |
| JL16026 | 2016 | Male | 58 | MSM      | 124 | 6900    | NR  | I   | Recent infecion     | MH120047 | MH120140      | CRF01_AE   | CRF01_AE     | CRF01_AE | CTRPSNNTRTSMITIGPGQTFYRTGDIIGDIRQAF   | 90.7          | CNTSKLFKVIINGTGVNRDVTNGTILPC      |
| JL16027 | 2016 | Male | 23 | MSM      | 549 | 47100   | NR  | I   | Long-term infection | MH120048 | MH120141      | CRF01_AE   | CRF01_AE     | CRF01_AE | CTRPSNNTRTSSIMHGGPQAFYRTGDIIGDIRQAYC  | 44.2          | CNTSKLFNSTWYGNETREEDNANGTILPC     |
| JL16028 | 2016 | Male | 24 | MSM      | 570 | 91500   | NR  | I   | Recent infecion     | MH120049 | MH120142      | CRF01_AE   | CRF01_AE     | CRF01_AE | CTRPSNNIRTSFRIGPGQVFYRTGAIIGDIRKAYC   | 1.3           | CNTTKLFDSTWRTEVKTIGDNTTILPC       |
| JL16029 | 2016 | Male | 39 | Hetero   | 524 | 18200   | NR  | I   | Recent infecion     | MH120050 | MH120143      | CRF01_AE   | CRF01_AE     | CRF01_AE | CTRPSNNTRTSSVIGPGQTFYRTGDIIGDIRQAYC   | 91.3          | CNTTKLFNSTWRGNETMETGNNSTAILPC     |

|         |      |        |    |        |     |         |    |     |                     |          |               |          |              |          |                                      |               |                                       |
|---------|------|--------|----|--------|-----|---------|----|-----|---------------------|----------|---------------|----------|--------------|----------|--------------------------------------|---------------|---------------------------------------|
| JL16030 | 2016 | Male   | 18 | MSM    | 297 | 81800   | NR | I   | Long-term infection | MH120051 | MH120144      | CRF07_BC | CRF07_BC     | CRF07_BC | CTRPNNNTRKSIRIGPGQTFYATGDIIGDIRQAYC  | 78.8          | CNTSKLFNGTYNGTSNSNSTIVIPC             |
| JL16031 | 2016 | Male   | 49 | MSM    | 309 | 496000  | NR | I   | Recent infecion     | MH120052 | MH120145      | CRF07_BC | CRF07_BC     | CRF07_BC | CTRPNNNTRKSIRIGPGQTLATGEIIGDIREAHC   | 96.2          | CNTSKLFNSTYKPNSTYNDKSNSSSYITIPC       |
| JL16032 | 2016 | NR     | 29 | Hetero | 427 | 47600   | NR | I   | Recent infecion     | MH120053 | MH120146      | CRF07_BC | CRF07_BC     | CRF07_BC | CTRPNNNTRKSIRIGPGQTFYATGGIIGDIRQAHC  | 74.3          | CNTSGLFNSTYG-NGTFYMTNDTENDSSITIPC     |
| JL16033 | 2016 | Male   | 28 | MSM    | 236 | 22100   | NR | II  | Recent infecion     | MH120054 | MH120147      | CRF01_AE | CRF01_AE     | CRF01_AE | CTRPNNNTRGSIRIGPGQVFYRTGEITGDIRKAYC  | 10.1          | CNTTKLFNNAQNETNNTIIPC                 |
| JL16034 | 2016 | NR     | 19 | MSM    | 506 | 75000   | NR | I   | Recent infecion     | MH120055 | MH120148      | CRF01_AE | CRF01_AE     | CRF01_AE | CTRPNNNTRGITMGPGKTFYRTGDIIGDIRQAYC   | 51.8          | CNTTKLFNNTGGNGTIIIPC                  |
| JL16035 | 2016 | Male   | 32 | MSM    | 268 | 39500   | NR | I   | Recent infecion     | MH120056 | MH120149      | CRF01_AE | CRF01_AE     | CRF01_AE | CTRPNNNTRTSIRIGPGQMFYRTGEIIGDIRKAYC  | 18.3          | CNTTKLFNSTENGMEGLNGTIIIPC             |
| JL16036 | 2016 | Male   | 28 | MSM    | 370 | 1800000 | NR | I   | Recent infecion     | MH120057 | MH120150      | CRF07_BC | CRF07_BC     | CRF07_BC | CTRPNNNTRKSIRIGPGQTFYATGEVIGDIRQAHC  | 45.4          | CNTSGLFNSTFNSFTFNDFNDFNDRKNNITIPC     |
| JL16037 | 2016 | Male   | 36 | Hetero | 165 | 539800  | NR | I   | Recent infecion     | MH120058 | MH120151      | CRF01_AE | CRF01_AE     | CRF01_AE | CTRPNNNTRTSIRIGPGQTFYRTGEITGDIRKAYC  | 9             | CNTTKLFNSTGGNSKEGNNNDTIIIPC           |
| JL16038 | 2016 | Male   | 43 | MSM    | 72  | 48500   | NR | III | Long-term infection | MH120059 | MH120152      | CRF07_BC | CRF07_BC     | CRF07_BC | CTRPNNNTRKSIRIGPGQTFYATGEIIGNIRQAHC  | 84.6          | CNTSGLFNSTYMQNGTFTFNTHINSTDNSSSVLVIPC |
| JL16039 | 2016 | Female | 34 | Hetero | 39  | 70800   | NR | III | Long-term infection | MH120060 | MH120153      | CRF01_AE | CRF01_AE     | CRF01_AE | CTRPNNNTRTSIHMGPQKAFYRTGDIIGDIRQAYC  | 16.9          | CNTTKLFNSENNTEKGDINTIIPC              |
| JL16040 | 2016 | Male   | 22 | MSM    | 145 | 183000  | NR | III | Long-term infection | MH120061 | MH120154      | CRF01_AE | CRF01_AE     | CRF01_AE | CTRPNNNTRTSIRIGPGQVFYRTGDIIGDIRKAYC  | 1.7           | CNTTKLFNSTKNGTIEGTNGTIIIPC            |
| JL16041 | 2016 | Male   | 25 | MSM    | 227 | 26800   | NR | II  | Recent infecion     | MH120062 | MH120155      | CRF07_BC | CRF07_BC     | CRF07_BC | CIRPGNNTRKSIRIGPGQTFYATGDIIGDIRQAHC  | 65.4          | CNTSSLFNSTFQFNNETFNFTGNETSNTIIPC      |
| JL16042 | 2016 | Male   | 19 | MSM    | 457 | 449000  | NR | I   | Recent infecion     | MH120063 | MH120156      | CRF01_AE | CRF01_AE     | CRF01_AE | CTRPNNNTRKSIRIGPGQTFYRTGDIIGDIRQAYC  | 46.1          | CNTTKLFNSTWTGNESITEGNDNDTIIIPC        |
| JL16043 | 2016 | NR     | 27 | Hetero | 252 | 48000   | NR | I   | Recent infecion     | MH120064 | MH120157      | CRF01_AE | CRF01_AE     | CRF01_AE | CTRPNNNTRTSVIRIGPGQMFYRTGDIIGDIRKAYC | 43.2          | CDTTKLFNDTENEIMKGFNTIIPC              |
| JL16044 | 2016 | Male   | 29 | MSM    | 274 | 13100   | NR | I   | Recent infecion     | MH120065 | MH120158      | CRF01_AE | CRF01_AE     | CRF01_AE | STRPCINTGTGITLGPAGALFGTGLIGNERKAYH   | 0             | VYTTEGINNTGGNNNDTIIIPC                |
| JL16045 | 2016 | Male   | 41 | MSM    | 164 | 116200  | NR | III | Long-term infection | MH120066 | MH120159      | CRF01_AE | CRF01_AE     | CRF01_AE | CTRPNNNTRTSIRIGPGQTFYATGEIIGDIRKAYC  | 13.2          | CNTTKLFNSTENGTEGNDTIIIPC              |
| JL16046 | 2016 | Male   | 28 | Hetero | 242 | 22700   | NR | I   | Recent infecion     | MH120067 | MH120160      | B        | B            | B        | CIRPNNNTRRSINIGPGRAFAYATDIIIGDIRQAHC | 57.1          | CNTKQLFNSTWNSQLNSNDTGGNDTIIISLPC      |
| JL16047 | 2016 | Male   | 27 | MSM    | 503 | 70800   | NR | I   | Recent infecion     | MH120068 | Not available | CRF07_BC | Not obtained | CRF07_BC | Not available                        | Not available | Not available                         |
| JL16048 | 2016 | Male   | 75 | MSM    | 390 | 5430    | NR | I   | Recent infecion     | MH120069 | MH120161      | CRF07_BC | CRF07_BC     | CRF07_BC | CTRPNNNTRKSIRIGPGQTFYATGDIIGDPRQAHC  | 44.6          | CNTTILFNSTYYDIKINDTLKNITIPC           |
| JL16049 | 2016 | Male   | 24 | MSM    | 505 | 183000  | NR | I   | Recent infecion     | MH120070 | MH120162      | CRF01_AE | CRF07_BC     | URF 0107 | CIRPNNNTRKSIRIGPGQTFYATGDIIGDIRQAHC  | 84.9          | CNTSGLFNSTYMSNGTFMFSNNTI-NDTESNTIIPC  |
| JL16050 | 2016 | Male   | 24 | MSM    | 512 | 110000  | NR | I   | Recent infecion     | MH120071 | MH120163      | CRF01_AE | CRF01_AE     | CRF01_AE | CTRPNNNTRTSIRIGPGQTFYRTGDIIGDIRKAYC  | 44.5          | CNTTKLFNGTENGTEGLNGTIIIPC             |
| JL16051 | 2016 | Male   | 36 | MSM    | 726 | 2800    | NR | I   | Recent infecion     | MH120072 | MH120164      | CRF01_AE | CRF01_AE     | CRF01_AE | CTRPNNNTRTSINMGPGRAFAYRTGDIIGDIRQAYC | 44.2          | CNTTKLFNHTNENRNTIIPC                  |
| JL16052 | 2016 | Male   | 22 | MSM    | 376 | 8830    | NR | I   | Long-term infection | MH120073 | MH120165      | CRF01_AE | CRF01_AE     | CRF01_AE | CTRPNNNTRTGIMHGPQKAFYRTGDIIGDIRQAYC  | 6.8           | CNTTKLFNSTWKNGTMEEDKLNGLTIIIPC        |
| JL16053 | 2016 | Male   | 21 | MSM    | 269 | 82200   | NR | I   | Recent infecion     | MH120074 | Not available | CRF01_AE | Not obtained | CRF01_AE | Not available                        | Not available | Not available                         |

\* HIV infection status was determined by Limiting-Antigen Avidity (LAg-Avidity) assays. The recent infection indicated individuals acquired HIV infection within a mean time period of 130 days, and long-term infection indicated individuals acquired HIV infection over a mean time period of 130 days.

\*\* Subtype was determined by both gag and env genotypes. The subtypes of five samples lacking env genotype information was determined by the gag genotype alone.

\*\*\* FPR was the false positive rate in coreceptor prediction using online Geno2Pheno tool.

NR: not recorded; Hetero: heterosexual; MSM: male sex with male

**Table S3 Virological and clinical information of 214 Jilin reference sequences from HIV database**

| Sequence Name | Genbank accession number | Subtype   | Sampling Year | CD4 count    | Gender       | Risk Factor        | Gene region |
|---------------|--------------------------|-----------|---------------|--------------|--------------|--------------------|-------------|
| CNJL12        | AY548241                 | B         | 2004          | Not recorded | Not recorded | Not recorded       | pol         |
| CNJL13        | AY548242                 | B         | 2004          | Not recorded | Not recorded | Not recorded       | pol         |
| CNJL14        | AY548243                 | B         | 2004          | Not recorded | Not recorded | Not recorded       | pol         |
| CNJL16        | AY548244                 | B         | 2004          | Not recorded | Not recorded | Not recorded       | pol         |
| CNJL18        | AY548281                 | B         | 2004          | Not recorded | Not recorded | Not recorded       | pol         |
| CNJL19        | AY548245                 | B         | 2004          | Not recorded | Not recorded | Not recorded       | pol         |
| CNJL20        | AY548246                 | B         | 2004          | Not recorded | Not recorded | Not recorded       | pol         |
| CNJL21        | AY548247                 | B         | 2004          | Not recorded | Not recorded | Not recorded       | pol         |
| CNJL22        | AY548248                 | B         | 2004          | Not recorded | Not recorded | Not recorded       | pol         |
| CNJL27        | AY548249                 | B         | 2004          | Not recorded | Not recorded | Not recorded       | pol         |
| CNJL29        | AY548250                 | B         | 2004          | Not recorded | Not recorded | Not recorded       | pol         |
| CNJL3         | AY548236                 | B         | 2004          | Not recorded | Not recorded | Not recorded       | pol         |
| CNJL30        | AY548282                 | B         | 2004          | Not recorded | Not recorded | Not recorded       | pol         |
| CNJL31        | AY548251                 | B         | 2004          | Not recorded | Not recorded | Not recorded       | pol         |
| CNJL33        | AY548289                 | B         | 2004          | Not recorded | Not recorded | Not recorded       | pol         |
| CNJL35        | AY548252                 | B         | 2004          | Not recorded | Not recorded | Not recorded       | pol         |
| CNJL36        | AY548283                 | B         | 2004          | Not recorded | Not recorded | Not recorded       | pol         |
| CNJL38        | AY548253                 | B         | 2004          | Not recorded | Not recorded | Not recorded       | pol         |
| CNJL4         | AY548237                 | B         | 2004          | Not recorded | Not recorded | Not recorded       | pol         |
| CNJL40        | AY548284                 | B         | 2004          | Not recorded | Not recorded | Not recorded       | pol         |
| CNJL41        | AY548254                 | B         | 2004          | Not recorded | Not recorded | Not recorded       | pol         |
| CNJL43        | AY548285                 | B         | 2004          | Not recorded | Not recorded | Not recorded       | pol         |
| CNJL44        | AY548255                 | B         | 2004          | Not recorded | Not recorded | Not recorded       | pol         |
| CNJL46        | AY548256                 | B         | 2004          | Not recorded | Not recorded | Not recorded       | pol         |
| CNJL48        | AY548257                 | B         | 2004          | Not recorded | Not recorded | Not recorded       | pol         |
| CNJL50        | AY548258                 | B         | 2004          | Not recorded | Not recorded | Not recorded       | pol         |
| CNJL51        | AY548286                 | B         | 2004          | Not recorded | Not recorded | Not recorded       | pol         |
| CNJL53        | AY548259                 | B         | 2004          | Not recorded | Not recorded | Not recorded       | pol         |
| CNJL54        | AY548260                 | B         | 2004          | Not recorded | Not recorded | Not recorded       | pol         |
| CNJL55        | AY548287                 | B         | 2004          | Not recorded | Not recorded | Not recorded       | pol         |
| CNJL56        | AY548261                 | B         | 2004          | Not recorded | Not recorded | Not recorded       | pol         |
| CNJL57        | AY548288                 | B         | 2004          | Not recorded | Not recorded | Not recorded       | pol         |
| CNJL59        | AY548262                 | B         | 2004          | Not recorded | Not recorded | Not recorded       | pol         |
| CNJL6         | AY548280                 | B         | 2004          | Not recorded | Not recorded | Not recorded       | pol         |
| CNJL60        | AY548263                 | B         | 2004          | Not recorded | Not recorded | Not recorded       | pol         |
| CNJL61        | AY548264                 | B         | 2004          | Not recorded | Not recorded | Not recorded       | pol         |
| CNJL7         | AY548238                 | B         | 2004          | Not recorded | Not recorded | Not recorded       | pol         |
| CNJL8         | AY548239                 | B         | 2004          | Not recorded | Not recorded | Not recorded       | pol         |
| CNJL9         | AY548240                 | B         | 2004          | Not recorded | Not recorded | Not recorded       | pol         |
| JL070032      | KC990127                 | 01&07     | 2007          | Not recorded | Male         | Male Sex with Male | NFLG*       |
| JL070038      | JF932490                 | B         | 2007          | Not recorded | Not recorded | Not recorded       | NFLG        |
| JL070009      | KC990126                 | CRF61_BC  | 2007          | Not recorded | Female       | Heterosexual       | NFLG        |
| JL.RF01       | KF850149                 | CRF96_cpx | 2010          | 413          | Male         | Heterosexual       | NFLG        |
| JL.RF02       | KF818774                 | 01B       | 2010          | Not recorded | Male         | Male Sex with Male | env         |
| JL.RF03       | KJ184176                 | 01&07     | 2010          | Not recorded | Not recorded | Heterosexual       | NFLG        |
| JL.RF04       | KF818776                 | 01C       | 2010          | Not recorded | Not recorded | Heterosexual       | env         |
| JL.RF05       | KJ184177                 | 01BC      | 2010          | Not recorded | Not recorded | Heterosexual       | NFLG        |
| JL.RF06       | KF818778                 | 01C       | 2010          | Not recorded | Not recorded | Heterosexual       | env         |
| JL.RF07       | KF859773                 | 01B       | 2010          | Not recorded | Male         | Male Sex with Male | NFLG        |
| JL100005      | JX112846                 | CRF01_AE  | 2010          | Not recorded | Not recorded | Heterosexual       | NFLG        |
| JL100007      | JX112847                 | CRF01_AE  | 2010          | Not recorded | Male         | Male Sex with Male | NFLG        |
| JL100010      | KC990124                 | CRF61_BC  | 2010          | Not recorded | Male         | Heterosexual       | NFLG        |
| JL100014      | JX112848                 | CRF01_AE  | 2010          | Not recorded | Not recorded | Heterosexual       | NFLG        |
| JL100020      | JX112849                 | CRF01_AE  | 2010          | Not recorded | Male         | Male Sex with Male | NFLG        |
| JL100021      | KF818788                 | CRF01_AE  | 2010          | Not recorded | Male         | Male Sex with Male | gag         |
| JL100022      | KF818789                 | CRF01_AE  | 2010          | Not recorded | Not recorded | Heterosexual       | gag         |
| JL100024      | KF818790                 | C         | 2010          | Not recorded | Male         | Male Sex with Male | gag         |

|          |          |          |      |              |              |                    |      |
|----------|----------|----------|------|--------------|--------------|--------------------|------|
| JL100025 | KF818791 | CRF01_AE | 2010 | Not recorded | Male         | Male Sex with Male | gag  |
| JL100027 | KF818663 | CRF01_AE | 2010 | Not recorded | Male         | Male Sex with Male | env  |
| JL100032 | KF818664 | CRF01_AE | 2010 | Not recorded | Male         | Male Sex with Male | env  |
| JL100034 | KF818665 | CRF01_AE | 2010 | Not recorded | Male         | Male Sex with Male | env  |
| JL100035 | KF818666 | B        | 2010 | Not recorded | Not recorded | Heterosexual       | env  |
| JL100036 | KF818667 | B        | 2010 | Not recorded | Not recorded | Heterosexual       | env  |
| JL100037 | KF818668 | CRF01_AE | 2010 | Not recorded | Male         | Male Sex with Male | env  |
| JL100038 | KF818669 | CRF01_AE | 2010 | Not recorded | Male         | Male Sex with Male | env  |
| JL100039 | KF818670 | B        | 2010 | Not recorded | Not recorded | Heterosexual       | env  |
| JL100040 | KF818800 | B        | 2010 | Not recorded | Male         | Male Sex with Male | gag  |
| JL100041 | KF818671 | CRF01_AE | 2010 | Not recorded | Male         | Male Sex with Male | env  |
| JL100042 | KF818672 | CRF01_AE | 2010 | Not recorded | Male         | Male Sex with Male | env  |
| JL100043 | KF818673 | CRF01_AE | 2010 | Not recorded | Not recorded | Heterosexual       | env  |
| JL100044 | KF818674 | C        | 2010 | Not recorded | Not recorded | Heterosexual       | env  |
| JL100047 | KF818675 | CRF01_AE | 2010 | Not recorded | Male         | Male Sex with Male | env  |
| JL100048 | KF818676 | C        | 2010 | Not recorded | Male         | Male Sex with Male | env  |
| JL100049 | KF818807 | CRF01_AE | 2010 | Not recorded | Male         | Male Sex with Male | gag  |
| JL100050 | KF818677 | CRF01_AE | 2010 | Not recorded | Not recorded | Heterosexual       | env  |
| JL100051 | KF818678 | CRF01_AE | 2010 | Not recorded | Male         | Male Sex with Male | env  |
| JL100052 | KF818679 | CRF01_AE | 2010 | Not recorded | Male         | Male Sex with Male | env  |
| JL100053 | KF818680 | CRF01_AE | 2010 | Not recorded | Male         | Male Sex with Male | env  |
| JL100054 | KF818681 | CRF01_AE | 2010 | Not recorded | Male         | Male Sex with Male | env  |
| JL100055 | KF818682 | CRF01_AE | 2010 | Not recorded | Male         | Male Sex with Male | env  |
| JL100056 | KF818683 | CRF01_AE | 2010 | Not recorded | Male         | Male Sex with Male | env  |
| JL100057 | KF818684 | CRF01_AE | 2010 | Not recorded | Male         | Male Sex with Male | env  |
| JL100059 | KF818685 | CRF01_AE | 2010 | Not recorded | Male         | Male Sex with Male | env  |
| JL100063 | KF818686 | B        | 2010 | Not recorded | Not recorded | Heterosexual       | env  |
| JL100064 | KF818687 | CRF01_AE | 2010 | Not recorded | Male         | Male Sex with Male | env  |
| JL100065 | KF818688 | C        | 2010 | Not recorded | Male         | Male Sex with Male | env  |
| JL100066 | KF818689 | B        | 2010 | Not recorded | Male         | Male Sex with Male | env  |
| JL100067 | KF818820 | CRF02_AG | 2010 | Not recorded | Not recorded | IV Drug User       | gag  |
| JL100068 | KF818691 | CRF01_AE | 2010 | Not recorded | Male         | Male Sex with Male | env  |
| JL100069 | KF818692 | CRF01_AE | 2010 | Not recorded | Not recorded | Heterosexual       | env  |
| JL100070 | KF818823 | C        | 2010 | Not recorded | Male         | Male Sex with Male | gag  |
| JL100071 | KF818693 | C        | 2010 | Not recorded | Male         | Male Sex with Male | env  |
| JL100073 | KF818694 | CRF01_AE | 2010 | Not recorded | Male         | Male Sex with Male | env  |
| JL100074 | KF818695 | B        | 2010 | Not recorded | Not recorded | Heterosexual       | env  |
| JL100078 | KF818697 | C        | 2010 | Not recorded | Not recorded | IV Drug User       | env  |
| JL100079 | KF818698 | CRF01_AE | 2010 | Not recorded | Male         | Male Sex with Male | env  |
| JL100084 | KF818699 | CRF02_AG | 2010 | Not recorded | Not recorded | Heterosexual       | env  |
| JL100085 | KF818700 | B        | 2010 | Not recorded | Not recorded | Heterosexual       | env  |
| JL100087 | KF818701 | CRF01_AE | 2010 | Not recorded | Not recorded | Heterosexual       | env  |
| JL100088 | KF818702 | CRF02_AG | 2010 | Not recorded | Not recorded | Heterosexual       | env  |
| JL100090 | KF818703 | B        | 2010 | Not recorded | Not recorded | Heterosexual       | env  |
| JL100091 | KF011493 | BC       | 2010 | Not recorded | Female       | Heterosexual       | NFLG |
| JL100097 | KF818704 | C        | 2010 | Not recorded | Not recorded | Heterosexual       | env  |
| JL100098 | KF818705 | CRF01_AE | 2010 | Not recorded | Male         | Male Sex with Male | env  |
| JL100099 | KF818706 | B        | 2010 | Not recorded | Not recorded | Heterosexual       | env  |
| JL100101 | KF818707 | B        | 2010 | Not recorded | Not recorded | Nosocomial         | env  |
| JL100102 | KF818708 | B        | 2010 | Not recorded | Not recorded | Nosocomial         | env  |
| JL.DG01  | KF818772 | CRF01_AE | 2011 | Not recorded | Male         | Male Sex with Male | env  |
| JL.RF08L | KJ184179 | 01&07    | 2011 | Not recorded | Not recorded | Heterosexual       | env  |
| JL.RF09  | KJ184180 | 01&07    | 2011 | 639          | Male         | Heterosexual       | NFLG |
| JL.RF10  | KF818782 | AIGH     | 2011 | Not recorded | Not recorded | Nosocomial         | env  |
| JL.RF11  | KF818783 | 01&07    | 2011 | Not recorded | Not recorded | Not Recorded       | env  |
| JL110001 | KF818709 | CRF01_AE | 2011 | Not recorded | Male         | Male Sex with Male | env  |
| JL110004 | KF818710 | CRF01_AE | 2011 | Not recorded | Male         | Male Sex with Male | env  |
| JL110005 | KF818711 | CRF01_AE | 2011 | Not recorded | Male         | Male Sex with Male | env  |
| JL110006 | KF818842 | CRF01_AE | 2011 | Not recorded | Male         | Male Sex with Male | gag  |
| JL110007 | KF818712 | CRF01_AE | 2011 | Not recorded | Male         | Male Sex with Male | env  |
| JL110009 | KF818713 | CRF01_AE | 2011 | Not recorded | Male         | Male Sex with Male | env  |
| JL110010 | KF818845 | CRF01_AE | 2011 | Not recorded | Male         | Male Sex with Male | gag  |
| JL110012 | KF818714 | CRF01_AE | 2011 | Not recorded | Male         | Male Sex with Male | env  |



|          |          |          |      |              |              |                    |     |
|----------|----------|----------|------|--------------|--------------|--------------------|-----|
| JL110013 | KF818715 | CRF01_AE | 2011 | Not recorded | Male         | Male Sex with Male | env |
| JL110014 | KF818716 | CRF01_AE | 2011 | Not recorded | Not recorded | Heterosexual       | env |
| JL110015 | KF818717 | CRF01_AE | 2011 | Not recorded | Male         | Male Sex with Male | env |
| JL110016 | KF818718 | CRF01_AE | 2011 | Not recorded | Male         | Male Sex with Male | env |
| JL110021 | KF818719 | CRF01_AE | 2011 | Not recorded | Not recorded | Heterosexual       | env |
| JL110023 | KF818720 | CRF01_AE | 2011 | Not recorded | Male         | Male Sex with Male | env |
| JL110024 | KF818721 | CRF01_AE | 2011 | Not recorded | Male         | Male Sex with Male | env |
| JL110025 | KF818722 | CRF01_AE | 2011 | Not recorded | Male         | Male Sex with Male | env |
| JL110026 | KF818723 | CRF01_AE | 2011 | Not recorded | Male         | Male Sex with Male | env |
| JL110028 | KF818724 | CRF01_AE | 2011 | Not recorded | Male         | Male Sex with Male | env |
| JL110029 | KF818725 | CRF01_AE | 2011 | Not recorded | Male         | Male Sex with Male | env |
| JL110030 | KF818726 | CRF01_AE | 2011 | Not recorded | Male         | Male Sex with Male | env |
| JL110031 | KF818727 | C        | 2011 | Not recorded | Male         | Male Sex with Male | env |
| JL110032 | KF818728 | CRF01_AE | 2011 | Not recorded | Male         | Male Sex with Male | env |
| JL110033 | KF818729 | CRF01_AE | 2011 | Not recorded | Male         | Male Sex with Male | env |
| JL110034 | KF818730 | CRF01_AE | 2011 | Not recorded | Male         | Male Sex with Male | env |
| JL110035 | KF818731 | CRF01_AE | 2011 | Not recorded | Male         | Male Sex with Male | env |
| JL110036 | KF818732 | CRF01_AE | 2011 | Not recorded | Male         | Male Sex with Male | env |
| JL110037 | KF818733 | CRF01_AE | 2011 | Not recorded | Male         | Male Sex with Male | env |
| JL110038 | KF818734 | CRF01_AE | 2011 | Not recorded | Male         | Male Sex with Male | env |
| JL110039 | KF818735 | CRF01_AE | 2011 | Not recorded | Male         | Male Sex with Male | env |
| JL110040 | KF818736 | CRF01_AE | 2011 | Not recorded | Male         | Male Sex with Male | env |
| JL110041 | KF818737 | CRF01_AE | 2011 | Not recorded | Male         | Male Sex with Male | env |
| JL110044 | KF818738 | B        | 2011 | Not recorded | Male         | Male Sex with Male | env |
| JL110046 | KF818739 | CRF01_AE | 2011 | Not recorded | Not recorded | Heterosexual       | env |
| JL110047 | KF818740 | CRF01_AE | 2011 | Not recorded | Male         | Male Sex with Male | env |
| JL110048 | KF818741 | C        | 2011 | Not recorded | Male         | Male Sex with Male | env |
| JL110051 | KF818742 | CRF01_AE | 2011 | Not recorded | Male         | Male Sex with Male | env |
| JL110052 | KF818743 | C        | 2011 | Not recorded | Male         | Male Sex with Male | env |
| JL110054 | KF818744 | C        | 2011 | Not recorded | Male         | Male Sex with Male | env |
| JL110055 | KF818745 | CRF01_AE | 2011 | Not recorded | Male         | Male Sex with Male | env |
| JL110056 | KF818746 | CRF01_AE | 2011 | Not recorded | Not recorded | Heterosexual       | env |
| JL110057 | KF818747 | B        | 2011 | Not recorded | Not recorded | Heterosexual       | env |
| JL110060 | KF818748 | B        | 2011 | Not recorded | Not recorded | Heterosexual       | env |
| JL110061 | KF818749 | CRF01_AE | 2011 | Not recorded | Male         | Male Sex with Male | env |
| JL110062 | KF818750 | CRF01_AE | 2011 | Not recorded | Male         | Male Sex with Male | env |
| JL110064 | KF818751 | C        | 2011 | Not recorded | Male         | Male Sex with Male | env |
| JL110065 | KF818752 | CRF01_AE | 2011 | Not recorded | Not recorded | Heterosexual       | env |
| JL110066 | KF818753 | CRF01_AE | 2011 | Not recorded | Not recorded | Heterosexual       | env |
| JL110067 | KF818754 | B        | 2011 | Not recorded | Not recorded | Nosocomial         | env |
| JL110069 | KF818755 | C        | 2011 | Not recorded | Not recorded | Heterosexual       | env |
| JL110070 | KF818888 | CRF01_AE | 2011 | Not recorded | Male         | Male Sex with Male | gag |
| JL110071 | KF818756 | CRF01_AE | 2011 | Not recorded | Not recorded | Heterosexual       | env |
| JL110072 | KF818757 | CRF01_AE | 2011 | Not recorded | Male         | Male Sex with Male | env |
| JL110073 | KF818758 | B        | 2011 | Not recorded | Not recorded | Mother-to-Child    | env |
| JL110074 | KF818759 | B        | 2011 | Not recorded | Not recorded | Nosocomial         | env |
| JL110075 | KF818760 | C        | 2011 | Not recorded | Not recorded | Heterosexual       | env |
| JL110076 | KF818761 | B        | 2011 | Not recorded | Not recorded | Heterosexual       | env |
| JL110077 | KF818895 | B        | 2011 | Not recorded | Not recorded | Heterosexual       | gag |
| JL110085 | KF818762 | C        | 2011 | Not recorded | Male         | Male Sex with Male | env |
| JL110086 | KF818763 | CRF01_AE | 2011 | Not recorded | Male         | Male Sex with Male | env |
| JL110087 | KF818764 | C        | 2011 | Not recorded | Not recorded | IV Drug User       | env |
| JL110088 | KF818765 | B        | 2011 | Not recorded | Male         | Male Sex with Male | env |
| JL110089 | KF818766 | C        | 2011 | Not recorded | Not recorded | Heterosexual       | env |
| JL110090 | KF818767 | CRF01_AE | 2011 | Not recorded | Male         | Male Sex with Male | env |
| JL110092 | KF818768 | C        | 2011 | Not recorded | Not recorded | Heterosexual       | env |
| JL110093 | KF818769 | CRF01_AE | 2011 | Not recorded | Not recorded | Heterosexual       | env |
| JL110094 | KF818770 | B        | 2011 | Not recorded | Not recorded | Heterosexual       | env |
| JL110095 | KF818771 | CRF02_AG | 2011 | Not recorded | Not recorded | Heterosexual       | env |
| JL1001   | KJ544520 | B        | 2012 | Not recorded | Male         | Nosocomial         | pol |
| JL1002   | KJ544521 | B        | 2012 | Not recorded | Male         | Nosocomial         | pol |
| JL1009   | KJ544522 | B        | 2012 | Not recorded | Female       | Nosocomial         | pol |
| JL1013   | KJ544523 | B        | 2012 | Not recorded | Male         | Nosocomial         | pol |

|        |          |          |      |              |        |                    |     |
|--------|----------|----------|------|--------------|--------|--------------------|-----|
| JL1014 | KJ544524 | B        | 2012 | Not recorded | Male   | Heterosexual       | pol |
| JL1024 | KJ544525 | CRF01_AE | 2012 | Not recorded | Male   | Heterosexual       | pol |
| JL1030 | KJ544526 | B        | 2012 | Not recorded | Female | Nosocomial         | pol |
| JL1035 | KJ544527 | CRF01_AE | 2012 | Not recorded | Male   | Male Sex with Male | pol |
| JL1038 | KJ544528 | B        | 2012 | Not recorded | Female | Heterosexual       | pol |
| JL1041 | KJ544529 | CRF01_AE | 2012 | Not recorded | Male   | Heterosexual       | pol |
| JL1057 | KJ544530 | B        | 2012 | Not recorded | Male   | Heterosexual       | pol |
| JL1062 | KJ544531 | CRF01_AE | 2012 | Not recorded | Male   | Male Sex with Male | pol |
| JL1064 | KJ544532 | B        | 2012 | Not recorded | Male   | Male Sex with Male | pol |
| JL1067 | KJ544533 | B        | 2012 | Not recorded | Female | Heterosexual       | pol |
| JL2005 | KJ544534 | CRF61_BC | 2012 | Not recorded | Male   | Heterosexual       | pol |
| JL2006 | KJ544535 | CRF61_BC | 2012 | Not recorded | Female | Heterosexual       | pol |
| JL2012 | KJ544536 | CRF02_AG | 2012 | Not recorded | Female | Heterosexual       | pol |
| JL2027 | KJ544537 | B        | 2012 | Not recorded | Male   | Heterosexual       | pol |
| JL2036 | KJ544538 | C        | 2012 | Not recorded | Male   | Male Sex with Male | pol |
| JL2048 | KJ544539 | C        | 2012 | Not recorded | Male   | Heterosexual       | pol |
| JL2061 | KJ544540 | CRF01_AE | 2012 | Not recorded | Male   | Male Sex with Male | pol |
| JL2065 | KJ544541 | CRF01_AE | 2012 | Not recorded | Male   | Heterosexual       | pol |
| JL2072 | KJ544542 | B        | 2012 | Not recorded | Male   | Male Sex with Male | pol |
| JL2076 | KJ544543 | C        | 2012 | Not recorded | Male   | IV Drug User       | pol |
| JL2084 | KJ544544 | CRF01_AE | 2012 | Not recorded | Male   | Male Sex with Male | pol |
| JL3019 | KJ544545 | CRF01_AE | 2012 | Not recorded | Male   | Male Sex with Male | pol |
| JL3028 | KJ544546 | C        | 2012 | Not recorded | Male   | Male Sex with Male | pol |
| JL3038 | KJ544547 | CRF01_AE | 2012 | Not recorded | Male   | Male Sex with Male | pol |
| JL3050 | KJ544548 | CRF01_AE | 2012 | Not recorded | Male   | Male Sex with Male | pol |
| JL3055 | KJ544549 | CRF01_AE | 2012 | Not recorded | Female | Heterosexual       | pol |
| JL3059 | KJ544550 | CRF01_AE | 2012 | Not recorded | Male   | Male Sex with Male | pol |
| JL3071 | KJ544551 | CRF01_AE | 2012 | Not recorded | Male   | Male Sex with Male | pol |
| JL3085 | KJ544552 | C        | 2012 | Not recorded | Male   | Male Sex with Male | pol |
| JL3087 | KJ544553 | C        | 2012 | Not recorded | Male   | Heterosexual       | pol |
| JL3088 | KJ544554 | B        | 2012 | Not recorded | Male   | Male Sex with Male | pol |

\*NFLG, near full-length genome

**Table S4 Clinical and phylogenetic data of 96 Jilin reference sequences with available full-length V3-V4 regions obtained from HIV database**

| Sequence name | Sampling year | Gender | Risk Factor | CD4 count (per $\mu$ L) | Viral load (per $\mu$ L) | Co-infection | Clinical stage of disease | Subtype* | Env V3 sequence                      | FPR** | Env V4 sequence                         |
|---------------|---------------|--------|-------------|-------------------------|--------------------------|--------------|---------------------------|----------|--------------------------------------|-------|-----------------------------------------|
| JL100005      | 2010          | NR     | Hetero      | NR                      | NR                       | NR           | NR                        | CRF01_AE | CTRPSNNTRTSINIGPGQAFYRTGDIIGDIRQAYC  | 92.3  | CNTTKLFNSTWIGNETMEGGNSDTIILPC           |
| JL100007      | 2010          | Male   | MSM         | NR                      | NR                       | NR           | NR                        | CRF01_AE | CTRPSNNTRTSINIGPGQAFYRTGDIIGDIRQAYC  | 92.3  | CNTTKLFNSTWRGNENMTKGNDNDTIILPC          |
| JL100014      | 2010          | NR     | Hetero      | NR                      | NR                       | NR           | NR                        | CRF01_AE | CTRPSNNTRTSVNIIGPGQAFYRTGDIIGDIRQAYC | 93.8  | CNTTKLFNSTWTGNETKQEGNHTGTIILPC          |
| JL100020      | 2010          | Male   | MSM         | NR                      | NR                       | NR           | NR                        | CRF01_AE | CTRPSNNTITSISIGPGRFYRTGDIRGDIRQAYC   | 32    | CNTSKLFNSTWKGNETKEGGNDNDTIILPC          |
| JL100027      | 2010          | Male   | MSM         | NR                      | NR                       | NR           | NR                        | CRF01_AE | CTRPSNNTRTSITMGPQGFYRTGDIIGDIRKAYC   | 83.3  | CNTTKLFNINTTELFNSTGGNNNDTIILPC          |
| JL100032      | 2010          | Male   | MSM         | NR                      | NR                       | NR           | NR                        | CRF01_AE | CTRPSNNTRTSISIGPGRFYRTGDIIGDIRQAYC   | 6.7   | CNTTKLFNSTWIGNETMERGHNDTIILPC           |
| JL100034      | 2010          | Male   | MSM         | NR                      | NR                       | NR           | NR                        | CRF01_AE | CTRPSNNTRTSRIGPGQTFYRTGDIIGDIRQAYC   | 8.1   | CNTTKLFNSTWIGNETMERGSDNDTIILPC          |
| JL100037      | 2010          | Male   | MSM         | NR                      | NR                       | NR           | NR                        | CRF01_AE | CTRPSNNTRTSITMGPQGFYRTGDIIGDIRQAYC   | 54.2  | CNTTKLFNINTTKLFNSTGGNNNDTIILPC          |
| JL100038      | 2010          | Male   | MSM         | NR                      | NR                       | NR           | NR                        | CRF01_AE | CTRPSNNTRTSINIGPGRFYRTGDIIGDIRQAYC   | 7.4   | CNTTKLFNSTWTEVNSTWTEVNSTREESNSSDIILPC   |
| JL100041      | 2010          | Male   | MSM         | NR                      | NR                       | NR           | NR                        | CRF01_AE | CTRPSNNTRTSFRIGPGQVFYRTGDIIGDIRKAYC  | 1.5   | CNTSKLFNSTKNGTMEGLNGTIILPC              |
| JL100042      | 2010          | Male   | MSM         | NR                      | NR                       | NR           | NR                        | CRF01_AE | CTRPSNNTRTSINIGPGRFYRTGDIIGDIRQAYC   | 49.2  | CNTTKLFNSTGGNNNDTIILPC                  |
| JL100043      | 2010          | NR     | Hetero      | NR                      | NR                       | NR           | NR                        | CRF01_AE | CTRPSNNTRTSISIGPGRFYRTGDIIGDIRQAYC   | 3.7   | CNTTKLFNSTQFNSTGGNDNGSDFNSTGGNDNGTIILP- |
| JL100047      | 2010          | Male   | MSM         | NR                      | NR                       | NR           | NR                        | CRF01_AE | CTRPSNNTRTSRIGPGQVFYRTGDIIGDIRKAYC   | 4.8   | CNTTKLFNSTQNGTMEGLNTTIILPC              |
| JL100051      | 2010          | Male   | MSM         | NR                      | NR                       | NR           | NR                        | CRF01_AE | CTRPSNNTRTSITMGPQGFYRTGDIIGDIRQAYC   | 15    | CNTTKLFNSTWIRNETMRGGNETMKRDNGSDTIILPC   |
| JL100052      | 2010          | Male   | MSM         | NR                      | NR                       | NR           | NR                        | CRF01_AE | CTRPSNNTRTSINIGPGQVFYRTGDIIGDIRQAYC  | 98.9  | CNTTKLFNSTWRGNETMREGNASDTIILPC          |
| JL100053      | 2010          | Male   | MSM         | NR                      | NR                       | NR           | NR                        | CRF01_AE | CTRPSNNTRTSINIGPGRFYRTGDIIGDIRQAYC   | 27.5  | CNTTKLFNSIWIGNETEVEGNNDTIILPC           |
| JL100056      | 2010          | Male   | MSM         | NR                      | NR                       | NR           | NR                        | CRF01_AE | CTRPSNNTRTSINIGPGRFYRTGDIIGDIRQAYC   | 49.2  | CNTTKLFNSNTTTLFNSTGGNNNDTIILPC          |
| JL100057      | 2010          | Male   | MSM         | NR                      | NR                       | NR           | NR                        | CRF01_AE | CTRPSNNTRTSIRIGPGQVFYRTGDIIGDIRKAYC  | 6.9   | CNTTKLFNSTENGTRREGLNGTIILPC             |
| JL100059      | 2010          | Male   | MSM         | NR                      | NR                       | NR           | NR                        | CRF01_AE | CTRPSNNTRTSIRIGPGQVFYRTGDIIGDIRRAYC  | 7.8   | CNTTKLFNSTENGTRREGLNGTVILPC             |
| JL100064      | 2010          | Male   | MSM         | NR                      | NR                       | NR           | NR                        | CRF01_AE | CTRPSNNTRTSIRIGPGQVFYRTGDIIGDIRQAYC  | 58.3  | CNTSKLFNSTWIGNETKEGGNDTSPILPC           |
| JL100068      | 2010          | Male   | MSM         | NR                      | NR                       | NR           | NR                        | CRF01_AE | CTRPSNNTRTSRIGPGQVFYRTGDIIGDIRKAYC   | 4.8   | CNTTKLFNSTENXTMEGLNTTIILPC              |
| JL100069      | 2010          | NR     | Hetero      | NR                      | NR                       | NR           | NR                        | CRF01_AE | CTRPSNNTRTSITMGPQGFYRTGDIIGDIRQAYC   | 54.2  | CNTSKLFNSTGGNYSTEGNYNDTIILPC            |
| JL100073      | 2010          | Male   | MSM         | NR                      | NR                       | NR           | NR                        | CRF01_AE | CTRPSNNTRTSISIGPGQVFYRTGDIIGDIRQAYC  | 9     | CNTSKLFNSTWRGNETKEGSDNDTIILPC           |
| JL100079      | 2010          | Male   | MSM         | NR                      | NR                       | NR           | NR                        | CRF01_AE | CTRPSNNTRTSISIGPGRFYRTGDIIGDIRQAYC   | 37.1  | CNTTKLFNSTWIGNETKEGGNSDTIILPC           |

|          |      |      |        |    |    |    |    |          |                                      |      |                                  |
|----------|------|------|--------|----|----|----|----|----------|--------------------------------------|------|----------------------------------|
| JL100087 | 2010 | NR   | Hetero | NR | NR | NR | NR | CRF01_AE | CTRPSNNTRTSIHIGPGQVIFYQTGDIIGNIRQAYC | 47.3 | CNTTPLFKYNTTLNRYTKETTENGSIILKC   |
| JL100098 | 2010 | Male | MSM    | NR | NR | NR | NR | CRF01_AE | CTRPSNNTRTSITMGPQKTFYRTGDIIGDIRQAYC  | 54.2 | CDTTKLFNSTGGNNNDTILPC            |
| JL110001 | 2011 | Male | MSM    | NR | NR | NR | NR | CRF01_AE | CTRPSNNTRRESINIGPGRFYKTGDIIGDIRAFC   | 6.7  | CNTTKLFNTTKLFNSTETNNGTILPC       |
| JL110004 | 2011 | Male | MSM    | NR | NR | NR | NR | CRF01_AE | CTRPNYNNTRTRITMGPQKXFYKTGEIIGDIRKAYC | 0.2  | CNTTKMFNSTWGGNETKEGGNNTTILPC     |
| JL110005 | 2011 | Male | MSM    | NR | NR | NR | NR | CRF01_AE | CTRPSNNIRTSMRIGPGQVIFYRTGAITGDIRKAYC | 1.7  | CNTTKLFNSTENGTEELNGTILPC         |
| JL110007 | 2011 | Male | MSM    | NR | NR | NR | NR | CRF01_AE | CTRPSNNTRTSIRIGPGQVIFYRTGDIIGDIRKAYC | 3.7  | CNTTKLFNSTENGTEIENGLNGTILPC      |
| JL110009 | 2011 | Male | MSM    | NR | NR | NR | NR | CRF01_AE | CTRPSNNTRTSIGIGPGRTFYRTGDIIGDIRQAYC  | 5.1  | CNTTKLFNSTWIGNETTKQGNASDTILPC    |
| JL110012 | 2011 | Male | MSM    | NR | NR | NR | NR | CRF01_AE | CTRPSNNTRTSISIGPGQTFYRTGDIIGDIRKAYC  | 76.8 | CNTTKLFNSTQNGTILPC               |
| JL110013 | 2011 | Male | MSM    | NR | NR | NR | NR | CRF01_AE | CTRPSNNTRTSIRIGPGQMFYKTGDIXGDIRKAYC  | 3.7  | CNTTKLFNSTKNGTIEGLNGTILPC        |
| JL110014 | 2011 | NR   | Hetero | NR | NR | NR | NR | CRF01_AE | CTRPSNNTRTSITIGPGRFYRTGDIIGDIRQAYC   | 11.5 | CNTTKLFNSIWIGNETMERGNDNDTDTITLPC |
| JL110015 | 2011 | Male | MSM    | NR | NR | NR | NR | CRF01_AE | CTRPSNNIRTSMRIGPGQVHFRTGAITGDIRKAYC  | 1.7  | CNTTKLFNSTENGTEELNGTILPC         |
| JL110016 | 2011 | Male | MSM    | NR | NR | NR | NR | CRF01_AE | CTRPSNNTRTSINMGPQKAFYRTGDIIGDIRQAYC  | 49   | CNTTKLFNSNNNSNNSKEGNNTDITLPC     |
| JL110021 | 2011 | NR   | Hetero | NR | NR | NR | NR | CRF01_AE | CTRPSNNTRTSIRIGPGQVIFYRTGDIIGDIRSAYC | 80.1 | CNTTKLFNGTENGTEGNSNHTIIPC        |
| JL110023 | 2011 | Male | MSM    | NR | NR | NR | NR | CRF01_AE | CTRPSNNTRTSITIGPGRFYRTGDIIGDIRQAYC   | 27.5 | CNTTKLFNSIWIGNETMERGNDSDTILPC    |
| JL110024 | 2011 | Male | MSM    | NR | NR | NR | NR | CRF01_AE | CTRPSNNTRTSIRIGPGQVIFYRTGDIIGDIRRAYC | 6.7  | CNTTKLFNSTWIGNETIEKGNATDITLPC    |
| JL110025 | 2011 | Male | MSM    | NR | NR | NR | NR | CRF01_AE | CTRPSNNTRTSINIGPGRTFYRTGDIIGDIRQAYC  | 83   | CNTTKLFNSTGGNNNGTILPC            |
| JL110026 | 2011 | Male | MSM    | NR | NR | NR | NR | CRF01_AE | CTRPSNNTRTSIRIGPGQVIFYRTGDIIGNIRKAYC | 3.5  | CNTTKLFNSTENGTEIESNTTILPC        |
| JL110028 | 2011 | Male | MSM    | NR | NR | NR | NR | CRF01_AE | CTRPSNNTRTSIRIGPGQTFYRTGDIIGDIRQAYC  | 58.3 | CNTTKLFNSTWIGNETMETGKNSSTILPC    |
| JL110029 | 2011 | Male | MSM    | NR | NR | NR | NR | CRF01_AE | CTRPSNNTRTSITIGPGRFYRTGDIIGDIRQAYC   | 93.9 | CNTSKLFNSTWEGNETTREGHDNDTILPC    |
| JL110032 | 2011 | Male | MSM    | NR | NR | NR | NR | CRF01_AE | CTRPSNNTRTSIHIGPGQTFYRTGDIIGNIRQAYC  | 96.7 | CNTTKLFNSTWIGNETREEGKSDTILPC     |
| JL110033 | 2011 | Male | MSM    | NR | NR | NR | NR | CRF01_AE | CTRPSNNTRTSITMGPQKTFYRTGDIIGDIRQAYC  | 91.9 | CNTTKLFNSKLFNSTGGNNNDTILPC       |
| JL110034 | 2011 | Male | MSM    | NR | NR | NR | NR | CRF01_AE | CTRPSNNKRKSAIGPQAFYRTGDIIGDIRQAYC    | 5.9  | CNTTKLFNSTFNGTEMKNETREKNDTILPC   |
| JL110035 | 2011 | Male | MSM    | NR | NR | NR | NR | CRF01_AE | CTRPSNNTRTGIRIGPGQVIFYRTGDIIGDIRSAYC | 63.1 | CNTTKLFDGTENGTEGNSNHTIIPC        |
| JL110036 | 2011 | Male | MSM    | NR | NR | NR | NR | CRF01_AE | CTRPSNNTRTSIRIGPGQMFYRTGDIIGDIRKAYC  | 24.7 | CNTTKLFNSTENGTELEGNNTIIPC        |
| JL110037 | 2011 | Male | MSM    | NR | NR | NR | NR | CRF01_AE | CTRPSNNTRTSMSIGPGQVIFYRTGDIIGDIRQAYC | 26.9 | CNTTKLFNSTWMRNETMREGNKTDIILPC    |
| JL110038 | 2011 | Male | MSM    | NR | NR | NR | NR | CRF01_AE | CTRPSNNTRTSITIGPGRFYRTGDIIGDIRQAYC   | 94.1 | CNTTKLFNSTWTGNETMEGGNSKTIILPC    |
| JL110039 | 2011 | Male | MSM    | NR | NR | NR | NR | CRF01_AE | CTRPSNNTRTSIRIGPGQMFYRTGDIIGDIRKAYC  | 18.3 | CNTTKLFNGTENGTEELNGTILPC         |

|          |      |        |        |    |    |    |      |          |                                      |      |                                                |
|----------|------|--------|--------|----|----|----|------|----------|--------------------------------------|------|------------------------------------------------|
| JL110040 | 2011 | Male   | MSM    | NR | NR | NR | NR   | CRF01_AE | CTRPFNNRTRTSIRIGPGQAFYRTGDIIGNIRQAYC | 12   | CNTTKLFNSTWNETSKEGNDNGTILPC                    |
| JL110041 | 2011 | Male   | MSM    | NR | NR | NR | NR   | CRF01_AE | CTRPSNNRQSRIGPGQMFYRTGAIIGDIRKAYC    | 42.3 | CNTTKLFNSTENGTMEGFNNTIILPC                     |
| JL110046 | 2011 | NR     | Hetero | NR | NR | NR | NR   | CRF01_AE | CTRPSNNRTRSTRIGPGQMFYRTGDIIGDIRKAYC  | 5.4  | CNTTKLFNRTENETMEGNSNTIILPC                     |
| JL110047 | 2011 | Male   | MSM    | NR | NR | NR | NR   | CRF01_AE | CTRPSNVRTSIPMPGKTFYRTGDIIGNIRQAYC    | 43.3 | CNTTKLFNSTGGNNNTGGNNNGTILPC                    |
| JL110055 | 2011 | Male   | MSM    | NR | NR | NR | NR   | CRF01_AE | CTRPSNNRTRTSISLPGGQAFYRTGDIIGDIRQAYC | 6.8  | CNTTKLFNSTWIGNESRVVGNDSDTIILPC                 |
| JL110062 | 2011 | Male   | MSM    | NR | NR | NR | NR   | CRF01_AE | CTRPSNNRTRTGIRIGPGQVYFRTGEITGDIRSAYC | 63.1 | CNTTKLFDGTETGTREGSNHTIIPC                      |
| JL110065 | 2011 | NR     | Hetero | NR | NR | NR | NR   | CRF01_AE | CTRPSNNTRRESIRIGPGQAFYRTGDIIGDIRQAYC | 56.1 | CNTTKLFGTEINNETMTXGTIILPC                      |
| JL110066 | 2011 | NR     | Hetero | NR | NR | NR | NR   | CRF01_AE | CTRPSNNTRKSINIGPGRVYFRTGDIIGDIRQAYC  | 3.1  | CNTTKLFNSTWEGNETMQGGNGNDTILPC                  |
| JL110072 | 2011 | Male   | MSM    | NR | NR | NR | NR   | CRF01_AE | CTRPSNNRTRTSINIGPGRVYFRTGDIIGDIRQAYC | 83   | CNTTKLFGTWFNGTWTGTETEGGNNIILPC                 |
| JL110086 | 2011 | Male   | MSM    | NR | NR | NR | NR   | CRF01_AE | CTRPSNNRTRTSINIGPGRVYFRTGDIIGDIRQAYC | 83   | CNTTKLFNNTGGNNNDTILPC                          |
| JL110090 | 2011 | Male   | MSM    | NR | NR | NR | NR   | CRF01_AE | CTRPSNNRTRTSINIGPGQAFYRTGDIIGNIRQAYC | 94.8 | CNTTKLFNSTWTGNETIGNETMENNNTIILPC               |
| JL110093 | 2011 | NR     | Hetero | NR | NR | NR | NR   | CRF01_AE | CTRPSNNRQSRIGPGRVYFRTGDIIGDIRQAYC    | 28.5 | CNTSKLFNSTWEGNETKERGNDNDTILPC                  |
| JL100091 | 2010 | NR     | Hetero | NR | NR | NR | AIDS | BC       | CTRPNNNRKSIRIGPGQTFYATGDIIGDIRQAHC   | 17   | CNTSSLFDGTYPNSTESNSSSITIPC                     |
| JL100044 | 2010 | Male   | Hetero | NR | NR | NR | NR   | C        | CTRPNNNRKSIRIGPGQTFYATGDIIGDIRQAHC   | 83   | CNTSGLFNSTYTNGTFTINSTYI-HNGTGNSSSV-----LVIPC   |
| JL100048 | 2010 | Male   | MSM    | NR | NR | NR | NR   | C        | CTRPGNNRKSIRIGPGQTFYATGGIIGDIRQAHC   | 50.5 | CNTSGLFNASGLNGSFIHNGTF-NGTESNST-----ITIPC      |
| JL100065 | 2010 | Male   | MSM    | NR | NR | NR | NR   | C        | CTRPNNNRKSIRIGPGQTFYATGDIIGDIKHAHC   | 99.4 | CNTSQLFNS----NSTY-----NG-----TIPC              |
| JL100071 | 2010 | NR     | MSM    | NR | NR | NR | NR   | C        | CTRPNNNRKSIRIGPGQTFYATGDIIGNIRQAYC   | 83   | CNTSGLFNSTYTPNGTFTFNSTYIHNHGTG-NSSSV-----LVIPC |
| JL100078 | 2010 | NR     | IDU    | NR | NR | NR | NR   | C        | CTRPNNNRKSIRIGPGQTFYATGDIIGDIRQAYC   | 78.8 | CNTSGLFNGTYNG-----TYMPNSTG-NTSS-----IIPC       |
| JL100097 | 2010 | Male   | Hetero | NR | NR | NR | NR   | C        | CTRPGNNRKSIRIGPGQTFYATGGIIGDIRQAHC   | 50.5 | CNTSRLFNGTYN-----PNGTE-NNSSN-----ITIPC         |
| JL110031 | 2011 | Male   | MSM    | NR | NR | NR | NR   | C        | CTRPNNNRKSIRIGPGQTFYATGAIIGDIRQAHC   | 70.6 | CNTSGLFNSTYINGTFRF-----NGTS-NDTESNST----ITIPC  |
| JL110048 | 2011 | Male   | MSM    | NR | NR | NR | NR   | C        | CTRPSNNRKSIRIGPGQSFYATGDIIGDIRQAHC   | 68.9 | CNTSKLFNSTY-----NGTS-NSYNGTNSSSIIIPC           |
| JL110052 | 2011 | Male   | MSM    | NR | NR | NR | NR   | C        | CTRPNNNRKSIRIGPGQTFYATGDIIGDIRQAHC   | 83   | CNTSGLFNSTYMYNSTY-----NGTS-NSSS-----IIVIPC     |
| JL110064 | 2011 | Male   | MSM    | NR | NR | NR | NR   | C        | CTRPNNNRKSIRIGPGQTFYATGDIIGDIRQAHC   | 65.9 | CNTSGLFNSTYMHNGTFTFNSTYI-NGTG-NSS-----LVIPC    |
| JL110085 | 2011 | NR     | MSM    | NR | NR | NR | NR   | C        | CTRPNNNRKSIRIGPGQTFYATGDIIGDIRQAHC   | 83   | CNTSGLFNSTYMHNGTFTFNSTYI-NGTG-NSSSV-----LVIPC  |
| JL110089 | 2011 | NR     | Hetero | NR | NR | NR | NR   | C        | CTRPGNNRKSIRIGPGQTFYATGDIIGDIRQAHC   | 69.8 | CNTSGLFNGTYT-----TF-NDTESNST-----ITLPC         |
| JL110092 | 2011 | Female | Hetero | NR | NR | NR | NR   | C        | CTRPGNNRKSIRIGPGQTFYATGDIIGDIRQAHC   | 69.8 | CNTSGLFNSTHMPNGTFM-HNGTF-NDTESNST-----ITIPC    |
| JL070038 | 2007 | NR     | NR     | NR | NR | NR | NR   | B        | CTRPNNNRKSINI--GPGQAWYTTGQIIGDIRQAHC | 83   | CNTSQLFNSTW---YENGTTTKNFTTGT-----ITLPC         |

|          |      |      |            |    |    |    |    |          |                                       |      |                                         |
|----------|------|------|------------|----|----|----|----|----------|---------------------------------------|------|-----------------------------------------|
| JL100035 | 2010 | NR   | Hetero     | NR | NR | NR | NR | B        | CARPNNNTRKSIHL--GPGKAWYTTGQIIGKIRQAYC | 6.8  | CNTSQLFNSTW---YSNGT--QNDTIGNDT----ITLPC |
| JL100036 | 2010 | NR   | Hetero     | NR | NR | NR | NR | B        | CTRPNNNTRKSIHL--GPGQALYTTGQIIGDIRQAHC | 90.9 | CNTSQLFNSTW---YTNNTQKGNIGNGT-----ITLPC  |
| JL100039 | 2010 | NR   | Hetero     | NR | NR | NR | NR | B        | CTRPNNNTRKSIHL--GPGKAWYTTGQIIGDIRQAHC | 14.7 | CDTSQLFNSTW----NNTSTWNTEGEHD----ITLPC   |
| JL100063 | 2010 | NR   | Hetero     | NR | NR | NR | NR | B        | CTRPNNNTRKSIPL--GPGRAWYTTGQIIGDIRQAHC | 43.2 | CNTSKLFNSTW----NNNSTWNDTTDNDT----ISLPC  |
| JL100085 | 2010 | NR   | Hetero     | NR | NR | NR | NR | B        | CTRPNNNTIKSIHL--GVGRAWYATGKIVGDIRQAHC | 2.9  | CNTSQLFNSTR----NGTNTGNDTSNITT----IILPC  |
| JL100090 | 2010 | NR   | Hetero     | NR | NR | NR | NR | B        | CTRPNNNTRKSINI--GPGQAWYTTGQIIGDIRQAHC | 83   | CNTSQLFNSTW---TGNSTSTTEGNNI-----ITLPC   |
| JL100099 | 2010 | NR   | Hetero     | NR | NR | NR | NR | B        | CTRPNNNTRKSIHL--GPGSTWFATGDIIGDIRQAHC | 89.6 | CNTSKLFNSTW---YANGTWNGTTGEGNI-----ITLPC |
| JL100101 | 2010 | NR   | Nosocomial | NR | NR | NR | NR | B        | CTRPNNNTRKSINI--GPGQAWYATGQIIGDIRQAHC | 91.4 | CNTSQLFNSTW---DPDGNSTCNSTAGGDN----ITLPC |
| JL110044 | 2011 | Male | MSM        | NR | NR | NR | NR | B        | CIRPGNTRKSIHL--GPGKAFYATGAIIGNIRQAHC  | 31.7 | NNTSNLFINI--SANETGLDNETWQSDFTGENITLQC   |
| JL110057 | 2011 | NR   | Hetero     | NR | NR | NR | NR | B        | CTRPNNNTRKSIQL--GXGRAWYTTGQIIGDIRQAHC | 6.8  | CNTSQLFNSTW----KVNSTGNDTTGNNT----ITLPC  |
| JL110060 | 2011 | NR   | Hetero     | NR | NR | NR | NR | B        | CTRPNNNTRKSIPL--GQGRAWYTTGQIIGDIRQAHC | 8.9  | CNTSQLFDSTW---DANSTSMGNNTTENDNSN--ITLPC |
| JL110067 | 2011 | NR   | Nosocomial | NR | NR | NR | NR | B        | CTRPNNNTRKRMSL--GPGKVWYTTGQIVGDIRQAHC | 0.5  | CNTSKLFNSVW---HANGTRNGTTTVN-----ITLPC   |
| JL110074 | 2011 | NR   | Nosocomial | NR | NR | NR | NR | B        | CTRPNNNTRKSIPL--GPGQAWYTTGDIIGDIRQAHC | 96.2 | CNTSQLFNGTW----NGT-TGNDT-----IVLPC      |
| JL110076 | 2011 | NR   | Hetero     | NR | NR | NR | NR | B        | CTRPNNNTRKSIQL--GQGRAWYATGDIIGDIRQAHC | 12.1 | CNTSQLFNSTW---YKNGTWGTRATENDT----ITLPC  |
| JL110088 | 2011 | Male | MSM        | NR | NR | NR | NR | B        | CTRPNNNTRKSIHL--GWGRSLYATGDIVGDIRQAHC | 83.3 | CNTTKLFTNLT---LTNNTWNTWPESNDTKS--IVLPC  |
| JL110094 | 2011 | NR   | Hetero     | NR | NR | NR | NR | B        | CTRPNNNTRKGIHL--GPGQWYATGEIIGDIRQAHC  | 91   | CNTSKLFNSTWENSTWNDTSTNET-----IILPC      |
| JL100084 | 2010 | NR   | Hetero     | NR | NR | NR | NR | CRF02_AG | CIRPGNTRKGVHIGPGQTFYATGDIIGDIRQAHC    | 96.2 | CNTSGLFNSTWDRDSNVTNSNVTNDTENENITLQC     |
| JL110095 | 2011 | NR   | Hetero     | NR | NR | NR | NR | CRF02_AG | CTRPANNTRESVRIGPGQTFYATGDIIGDIRQAHC   | 94.1 | CNTSGLFNSTWNSGTGNSMVTNNTNNGNITLQC       |

\* Subtype information was obtained from the HIV LANL database.

\*\* FPR was the false positive rate in coreceptor prediction using online Geno2Pheno tool.

NR: not recorded; Hetero: Heterosexual; MSM: male sex with male
